# Supplementary material
Source: publisher figshare collection journal article supplement (https://acs.figshare.com/ndownloader/files/22584902)

# **Supplementary Materials For**

## **Evolution of Lignin Chemical Structure during Bioethanol Production Process and Its Inhibition to Enzymatic Hydrolysis**

Chao Zhao<sup>\*,†</sup>, Xianliang Qiao<sup>‡</sup>, Qianjun Shao<sup>§</sup>, Muhammad Hassan<sup>1</sup>, Zhongqing Ma<sup>\*,†</sup>

<sup>†</sup>National Engineering Research Center for Wood-based Resource Utilization, School of Engineering, Zhejiang A&F University,

Lin'an, Zhejiang 311300, People's Republic of China

<sup>‡</sup>Zhejiang Collaborative Center of Efficient Utilization of Bamboo Resources, Zhejiang 311300, People's Republic of China

<sup>§</sup>Faculty of Mechanical Engineering & Mechanics, Ningbo University, Ningbo, Zhejiang 315211, People's Republic of China

<sup>1</sup>US-Pakistan Centre for Advanced Studies in Energy, National University of Science and Technology, Islamabad 44000,  
Pakistan

\*Corresponding author Tel.: +86 571-6374-6877. E-mail: zhaochao@zafu.edu.cn; mazqzafu@163.com

## Supplementary Figure Captions

**Figure S1.** TG curves of lignin pyrolysis with different heating rates (10, 15, 20, 25 °C/min). (UN-L, lignin isolated from untreated corn stover. EH-L, lignin isolated from enzymatic hydrolyzed residue of H-AFEX-treated corn stover)

**Figure S2.** DTG curves of lignin pyrolysis with different heating rates (10, 15, 20, 25 °C/min). (UN-L, lignin isolated from untreated corn stover. EH-L, lignin isolated from enzymatic hydrolyzed residue of H-AFEX-treated corn stover)

Figure S1

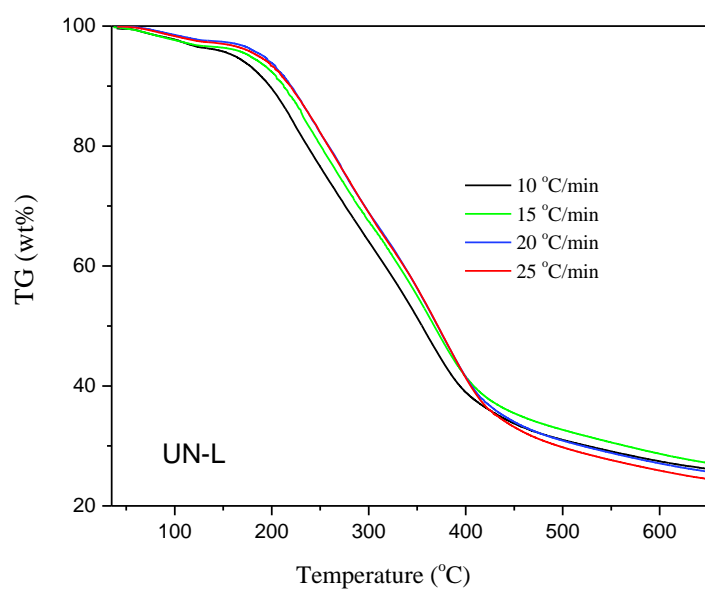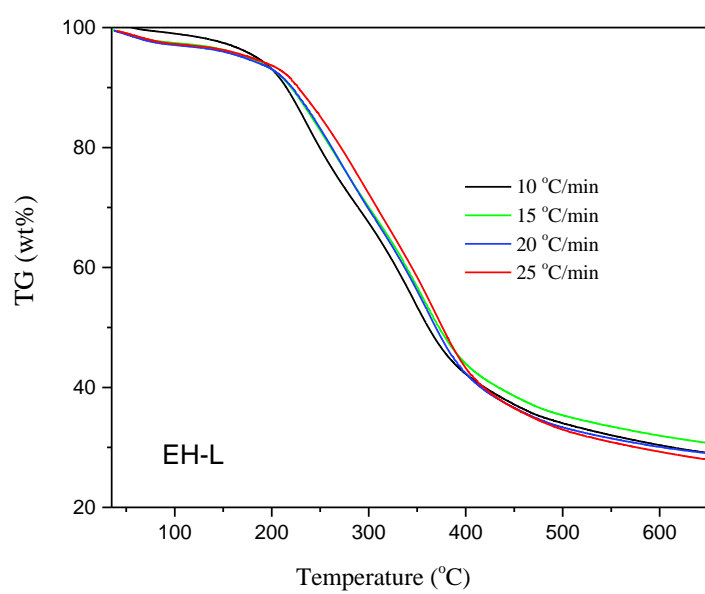

Figure S2

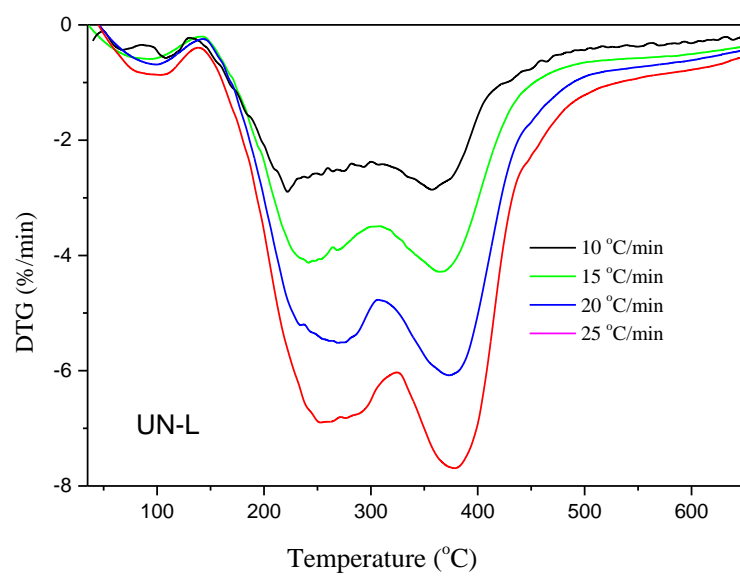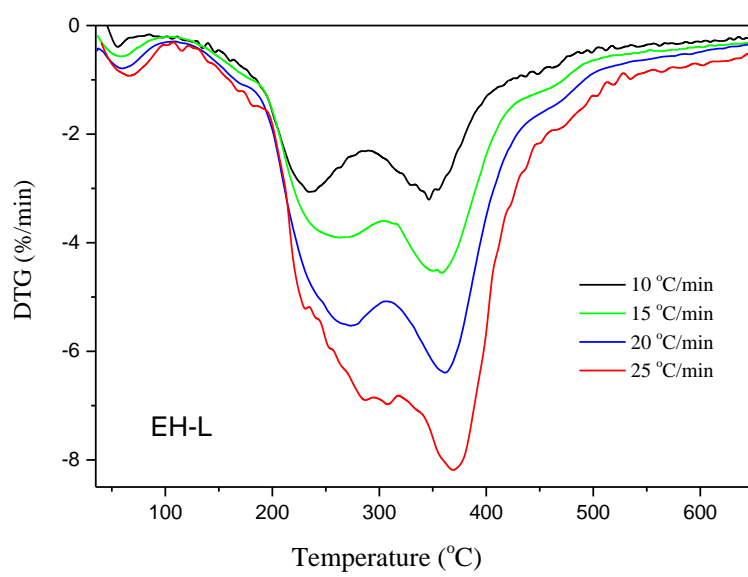

Supplement: Supplementary file 1 [file 22584902]
